# Supplementary material for: Relocation of earthquakes in the Southern and Eastern Alps(Austria, Italy) recorded by the dense, temporary SWATH–Dnetwork using a Markov chain Monte Carlo inversion
Source: Copernicus journal article supplement (doi:10.5194/se-2020-192), 2020-11-25
Supplement: Supplementary file 1 [file se-2020-192-supplement.zip]

## Sheet: Sheet1
Depth (km)	average Vp (km /s)	Vp uncertainty (km/s)	average Vp/Vs	Vp/Vs uncertainty	most probable Vp (km/s)	most probable Vp/Vs
0	5.944	0.013	1.797	0.032	5.935	1.795
1	5.945	0.013	1.776	0.038	5.935	1.795
2	5.945	0.013	1.755	0.04	5.945	1.705
3	5.945	0.013	1.729	0.034	5.945	1.705
4	5.946	0.013	1.713	0.024	5.945	1.705
5	5.946	0.013	1.702	0.009	5.945	1.695
6	5.946	0.013	1.7	0.004	5.945	1.695
7	5.947	0.013	1.699	0.004	5.945	1.695
8	5.947	0.013	1.699	0.004	5.945	1.695
9	5.947	0.013	1.699	0.004	5.945	1.695
10	5.947	0.013	1.699	0.004	5.945	1.695
11	5.947	0.013	1.699	0.004	5.945	1.695
12	5.947	0.013	1.699	0.004	5.945	1.695
13	5.947	0.013	1.699	0.004	5.945	1.695
14	5.948	0.014	1.7	0.004	5.945	1.695
15	5.949	0.015	1.7	0.004	5.945	1.695
16	5.95	0.018	1.699	0.005	5.945	1.695
17	5.955	0.038	1.7	0.006	5.945	1.695
18	5.961	0.049	1.701	0.008	5.945	1.695
19	5.974	0.072	1.702	0.012	5.945	1.695
20	5.99	0.095	1.705	0.016	5.945	1.695
21	6.02	0.134	1.709	0.022	5.945	1.695
22	6.049	0.163	1.713	0.027	5.945	1.695
23	6.072	0.188	1.717	0.03	5.945	1.705
24	6.108	0.218	1.722	0.033	5.945	1.705
25	6.133	0.237	1.725	0.035	5.945	1.705
26	6.215	0.281	1.734	0.037	5.945	1.705
27	6.315	0.311	1.744	0.037	5.945	1.705
28	6.505	0.301	1.762	0.03	6.765	1.775
29	6.634	0.233	1.772	0.022	6.825	1.775
30	6.658	0.214	1.774	0.02	6.835	1.775
31	6.69	0.189	1.775	0.018	6.835	1.775
32	6.699	0.179	1.775	0.018	6.835	1.775
33	6.735	0.167	1.774	0.018	6.835	1.775
34	6.759	0.157	1.772	0.019	6.835	1.775
35	6.773	0.152	1.772	0.019	6.835	1.775
36	6.795	0.142	1.771	0.018	6.835	1.775
37	6.808	0.143	1.771	0.019	6.835	1.775
38	6.811	0.143	1.771	0.018	6.835	1.775
39	6.814	0.144	1.77	0.019	6.835	1.775
40	6.837	0.156	1.769	0.018	6.835	1.775
41	6.854	0.168	1.767	0.019	6.835	1.775
42	6.869	0.178	1.767	0.02	6.835	1.775
43	6.891	0.191	1.766	0.022	6.825	1.775
44	6.914	0.208	1.765	0.023	6.825	1.775
45	6.945	0.234	1.765	0.025	6.825	1.775
46	6.993	0.273	1.766	0.027	6.835	1.775
47	7.057	0.318	1.767	0.029	6.835	1.775
48	7.132	0.361	1.77	0.032	6.835	1.775
49	7.182	0.382	1.772	0.034	6.835	1.775
50	7.239	0.401	1.773	0.036	6.835	1.775
51	7.316	0.427	1.775	0.037	6.835	1.775
52	7.413	0.447	1.778	0.04	6.835	1.775
53	7.521	0.453	1.781	0.043	6.835	1.775
54	7.644	0.444	1.785	0.045	6.835	1.775
55	7.747	0.424	1.788	0.048	7.645	1.775
56	7.828	0.403	1.792	0.05	8.205	1.775
57	7.875	0.389	1.793	0.051	8.205	1.775
58	7.912	0.38	1.794	0.051	8.205	1.775
59	7.935	0.378	1.795	0.052	8.205	1.775
60	7.949	0.377	1.795	0.051	8.205	1.775
61	7.949	0.377	1.795	0.051	8.205	1.775
62	7.949	0.377	1.795	0.051	8.205	1.775
